# Supplementary material for: Osteoprotegerin in Bone Metastases: Mathematical Solution to the Puzzle
Source: PLOS journal article supplement (doi:10.1371/journal.pcbi.1002703), 2012-10-18
Supplement: S2 (10.1371/journal.pcbi.1002703.s002) [file journal.pcbi.1002703.s002]

301 Moved Permanently

# Moved Permanently

The document has moved here.

---

Apache Server at www.ploscompbiol.org Port 80
